# Supplementary material for: RETRACTED: Intranasal Niosomal In Situ Gel as a Promising Approach for Enhancing Flibanserin Bioavailability and Brain Delivery: In Vitro Optimization and Ex Vivo/In Vivo Evaluation
Source: PubMed Central journal article supplement (PMC7356232; doi:10.3390/pharmaceutics12060485), 2020-05-27
Supplement: pharmaceutics-12-00485-s001.pdf [file pharmaceutics-12-00485-s001.pdf]

# Supplementary Materials: Intranasal Niosomal *In Situ* Gel as a Promising Approach for Enhancing Flibanserin Bioavailability and Brain Delivery: *In Vitro* Optimization and *Ex Vivo/In Vivo* Evaluation

Usama A. Fahmy, Shaimaa M. Badr-Eldin, Osama A. A. Ahmed, Hibah M. Aldawsari, Singkome Tima, Hani Z. Asfour, Mohammed W. Al-Rabia, Aya A. Negm, Muhammad H. Sultan, Osama A. A. Madkhali and Nabil A. Alhakamy

Table S1. Freeze-thaw cycles for the stability study of FLB Niosomes.

|      | Time 0       | Cycle 1      | Cycle 2      | Cycle 3      |
|------|--------------|--------------|--------------|--------------|
| Size | 46.35 ± 3.62 | 45.3 ± 2.71  | 48.3 ± 2.53  | 49.3 ± 3.12  |
| EE%  | 92.48 ± 4.19 | 92.01 ± 5.31 | 91.18 ± 3.26 | 90.78 ± 4.91 |

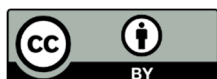

© 2020 by the authors. Submitted for possible open access publication under the terms and conditions of the Creative Commons Attribution (CC BY) license (<http://creativecommons.org/licenses/by/4.0/>).
